# Supplementary material
Source: publisher figshare collection journal article supplement (https://geolsoc.figshare.com/ndownloader/files/28009472)
Supplement: Supplementary file 1 [file 28009472]

## Sheet: Total
Table S6. Zircon temperature saturated of Permian granitic rocks from Phan Si Pan-Tu Le region, NW Vietnam.
Sample	Zr (ppm)	M	Watson and Hanchar, 1983	P. Boehnke et al. 2013
			T (Celcius)	T (Celcius)
PSP2b	1036	1.44739	972.081	962.816
PSP2c	801	1.46611	940.089	922.047
PSP2d	790	1.5002	935.224	914.55
PSP2f	766	1.46867	934.766	915.351
PSP2g	863	1.49343	945.974	928.134
PSP27	585	1.75354	879.535	837.027
PSP28a	651	1.64429	900.484	866.263
PSP28b	637	1.68197	894.771	857.919
PSP28c	708	1.74625	900.192	861.869
PSP28d	845	1.65456	928.034	899.157
PSP24	1081	1.30833	991.704	994.408
PSP29a	812	1.68785	920.462	888.587
PSP29b	780	1.78722	906.849	868.191
PSP30	862	1.2943	965.654	961.867
PSP31	759	1.51174	929.609	907.142
PSP32	1234	1.47258	990.808	985.232
FSP-01	1338	1.54414	993.301	984.904

## Sheet: ELIP-TZr
Citation	Sample	Rock type	Zr (ppm)	M	ToC (Watson and Harrison, 1983)	ToC (Boehnke et al., 2013)
Xu et al. (2010)	HY05-11	rhyolite	1104	1.26989	998.402	1004.93
Zhu et al. (2017)	RL-32(3)	rhyolite	1020	1.27961	987.542	990.484
Zhong et al. (2011)	CD-0401	granite	1326	1.53689	992.947	984.81
Xu et al. (2010)	HY05-5	rhyolite	1124	1.45161	981.521	974.508
Xu et al. (2010)	HY05-9	rhyolite	961	1.36667	971.296	965.616
Hei et al. (2018)	PZH-20	rhyolite	828	1.28217	962.104	957.931
Hei et al. (2018)	JZS-4	rhyolite	813	1.26995	961.171	957.315
Hei et al. (2018)	YN-11-289	rhyolite	888	1.35462	963.096	955.824
Hei et al. (2018)	PZH-12	rhyolite	997	1.46859	965.339	953.373
Shellnutt et al. (2010)	GS03-049	trachyte	1083	1.58106	963.813	946.313
Zhu et al. (2017)	RL-32(2)	rhyolite	977	1.50302	959.478	944.479
Shellnutt et al. (2010)	GS05-003	trachyte	1207	1.70237	964.44	941.576
Xu et al. (2010)	EM-45	rhyolite	726	1.32827	942.244	930.813
Hei et al. (2018)	PZH-10	rhyolite	761	1.38297	942.312	928.471
Hei et al. (2018)	PZH-5	rhyolite	748	1.37674	940.946	927.044
Hei et al. (2018)	JZS-5	rhyolite	709	1.34178	938.229	925.194
Xu et al. (2010)	EM-44	rhyolite	1010	1.65292	948.483	924.19
Xu et al. (2010)	HY-3	rhyolite	963	1.61707	946.498	923.33
Hei et al. (2018)	BC-1	rhyolite	795	1.45928	939.893	922.103
Hei et al. (2018)	YN-11-301	rhyolite	726	1.38585	936.665	921.31
Xu et al. (2010)	EM-34	rhyolite	1053	1.70746	947.943	921.138
Hei et al. (2018)	BC-2	rhyolite	708	1.40282	932.197	915.022
Hei et al. (2018)	PZH-40	rhyolite	611	1.29736	925.733	911.539
Cheng et al. (2017)	YN-12-28-1	rhyolite	771.596	1.53729	929.019	905.329
Shellnutt et al. (2010)	GS03-031	diorite, syeno	1033	1.82119	934.698	900.191
Zhang et al. (2019)	QS-5	syenite, quartz	889	1.69736	929.645	899.308
Cheng et al. (2017)	YN-12-33	rhyolite	770.864	1.65937	917.402	886.062
Cheng et al. (2017)	YN-12-33-1	rhyolite	734.161	1.64424	913.467	881.924
Zhang et al. (2019)	QS-8	syenite, quartz	690	1.68031	903.435	868.373
Cheng et al. (2017)	YN-12-29	rhyolite	681.211	1.68949	901.226	865.356
Zhang et al. (2019)	QS-3	syenite, quartz	593	1.6967	885.946	846.807
Xu et al. (2010)	EM-77	trachyte	674	1.83369	887.154	842.989
Hei et al. (2018)	YN-11-273	rhyolite	292	1.30652	847.99	815.937
Hei et al. (2018)	YN-11-272	dacite	304	1.36945	846.703	812.11
Hei et al. (2018)	YN-11-274	dacite	297	1.36961	844.43	809.381
Hei et al. (2018)	YN-11-271	rhyolite	284	1.39528	838.021	800.808
Referrences:
Shellnutt, J. G., Jahn, B. M., 2010. Formation of the Late Permian Panzhihua plutonic-hypabyssal-volcanic igneous complex: Implications for the genesis of Fe–Ti oxide deposits and A-type granites of SW China. Earth and Planetary Science Letters, 289, 3-4, 509–519.
Boehnke, P., Watson, E.B., Trail, D., Harrison, T.M., Schmitt, A.K., 2013. Zircon saturation re-revisited. Chemical Geology, 351, 324–334.
Cheng, L.L., Wang, Y., Herrin, J.S., Ren, Z.Y., Yang, Z.F., 2017. Origin of K-feldspar megacrysts in rhyolites from the Emeishan large igneous province, southwest China. Lithos, 294–295, 397-41.
Hei, X.H., Sua, S.G., Yu, W.G., Moa, X.X., Luo, Z.H., Liu, W.G., 2018. Rhyolites in the Emeishan large igneous province (SW China) with implications for plume-related felsic magmatism. Journal of Asian Earth Sciences, 164, 344-365.
Watson, E.B., Harrison, T.M., 1983. Zircon saturation revisited: temperature and composition effects in a variety of crustal magma types. Earth and Planetary Science Letters, 64, 295–304.
Xu, Y. G., Chung, S. L., Shao, H., He, B., 2010. Silicic magmas from the Emeishan large igneous province, Southwest China: Petrogenesis and their link with the end-Guadalupian biological crisis. Lithos, 119, 1-2, 47–60. doi:10.1016/j.lithos.2010.04.013
Zhang, Z.Z., Qin, J.F., Lai, S.C., Long, X.P., Lu, Y.J., Wang, X.Y., Zhu, Y., Zhang, F.Y., 2019. Origin of late Permian syenite and gabbro from the Panxi rift, SW China: The fractionation process of mafic magma in the inner zone of the Emeishan mantle plume. Lithos, 105160. doi:10.1016/j.lithos.2019.105160
Zhong, H., Campbell, I. H., Zhu, W. G., Allen, C. M., Hu, R.Z., Xie, L.-W., He, D. F., 2011. Timing and source constraints on the relationship between mafic and felsic intrusions in the Emeishan large igneous province. Geochimica et Cosmochimica Acta, 75, 5, 1374–1395
Zhu, B., Peate, D. W, Guo, Z.J., Liu, R. C., Du, W., 2017. Crustally derived granites in Dali, SW China: new constraints on silicic magmatism of the Central Emeishan Large Igneous Province. International Journal of Earth Sciences, 106, 7, 2503-2525.
